# Supplementary material for: Combining AI and human support in mental health: a digital intervention with comparable effectiveness to human-delivered care
Source: bioRxiv or medRxiv preprint supplement (doi:10.1101/2024.07.17.24310551), 2024-12-20
Supplement: Supplementary file [file media-1.pdf]

# Supplementary Information

## Combining AI and human support in mental health: a digital intervention with comparable effectiveness to human-delivered care

Clare E Palmer<sup>1</sup>, Emily Marshall<sup>1</sup>, Edward Millgate<sup>1</sup>, Graham Warren<sup>1</sup>, Michael P. Ewbank<sup>1</sup>, Elisa Cooper<sup>1</sup>, Samantha Lawes<sup>1</sup>, Malika Bouazzaoui<sup>1</sup>, Alastair Smith<sup>1</sup>, Chris Hutchins-Joss<sup>1</sup>, Jessica Young<sup>1</sup>, Morad Margoum<sup>2</sup>, Sandra Healey<sup>2</sup>, Louise Marshall<sup>1</sup>, Shaun Mehew<sup>1</sup>, Ronan Cummins<sup>1</sup>, Valentin Tablan<sup>1</sup>, Ana Catarino<sup>1</sup>, Andrew E Welchman<sup>1</sup> and Andrew D Blackwell<sup>1</sup>

<sup>1</sup>ieso Digital Health, The Jeffrey's Building, Cowley Road, Cambridge, CB4 0DS, UK

<sup>2</sup>Dorset HealthCare University NHS Foundation, Sentinel House, Nuffield Industrial Estate, Nuffield Road, Poole, UK

### Supplementary Information Table of Contents

|                                                                                                                                                                                |    |
|--------------------------------------------------------------------------------------------------------------------------------------------------------------------------------|----|
| <b>Supplementary Methods</b>                                                                                                                                                   |    |
| A priori definition of non-inferiority margin                                                                                                                                  | 2  |
| <b>Supplementary Tables</b>                                                                                                                                                    |    |
| Supplementary Table 1. Description of each module topic in the digital program.                                                                                                | 3  |
| Supplementary Table 2. Propensity-matching between groups.                                                                                                                     | 4  |
| Supplementary Table 3. Output from slope analysis comparing adherence rate over GAD-7 check-ins across groups.                                                                 | 5  |
| Supplementary Table 4. Output of linear regression model measuring the association between participant characteristics and adherence for the ITT sample.                       | 6  |
| Supplementary Table 5. Output of logistic regression model measuring association between participant characteristics and non-adherence.                                        | 7  |
| Supplementary Table 6. Rates of improvement, recovery, reliable recovery, responder and remission from baseline to final score across all groups.                              | 8  |
| Supplementary Table 7. Mean GAD-7 score across assessments stratified by baseline GAD-7 severity.                                                                              | 9  |
| Supplementary Table 8. Change in GAD-7, PHQ-9 and WSAS scores from baseline to final score stratified by baseline GAD-7 severity for the intervention sample.                  | 10 |
| Supplementary Table 9. Output of linear regression model measuring association between participant characteristics and change in GAD-7 scores for the ITT intervention sample. | 11 |
| Supplementary Table 10. Mean PHQ-9 score across assessments stratified by baseline GAD-7 severity.                                                                             | 12 |

## Supplementary Methods

### *A priori definition of non-inferiority margin*

The Food and Drugs Administration (FDA) recommends that the threshold for non-inferiority is set based on estimates of the active comparator in previously conducted studies (70). This threshold can be defined, for example, as 50% or less of the lower confidence interval of the expected effect of the active comparator vs placebo. While it is difficult to develop an appropriate placebo in the context of psychotherapy research, previous studies exploring the efficacy of internet-delivered psychotherapy for GAD, against a waiting list control group, demonstrate significant clinical benefits of these interventions. In these studies, medium to large between-group effect sizes are reported, ranging from 0.38 to 1.25 (38–40). The outcomes from these studies are aggregated using a fixed effect meta-analysis, results shown below.

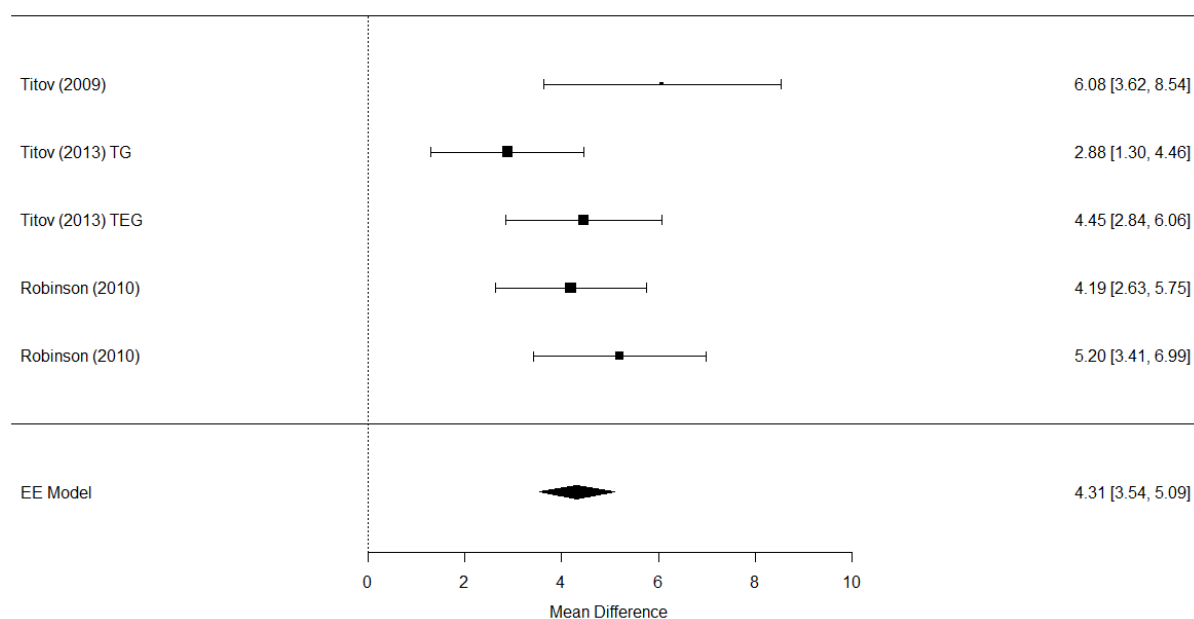

Here we define the non-inferiority margin as a GAD-7 score change of 1.8. This is equivalent to 50% of the lower limit of the 95% confidence interval of the fixed effect meta-analysis pooled result (i.e. 3.54/2).

## Supplementary Tables

**Supplementary Table 1. Description of each module topic in the digital program.** The digital program consisted of six modules with three sessions each following a pattern of (1) learning; (2) activity; (3) practice. The final modules (5 + 6) focused on consolidation of learning.

| Module | Topic                                                   | Description                                                                                                                                               |
|--------|---------------------------------------------------------|-----------------------------------------------------------------------------------------------------------------------------------------------------------|
| 1      | Getting to Know You + Learning About Worry & Anxiety    | Questions, reflections and information designed to help increase understanding of difficulties and prepare for making change.                             |
| 2      | Holding Thoughts Lightly                                | Focus on unhelpful patterns of thinking with activities and practices designed to promote more flexible ways to respond to thoughts.                      |
| 3      | Making Meaningful Moves Towards What Matters            | Focus on understanding and targeting unhelpful avoidance behaviors, with activities and practices designed to gradually reduce these unhelpful behaviors. |
| 4      | Taking a Different Perspective                          | Focus on unhelpful beliefs about worry which may be maintaining anxiety symptoms, with activities and practices designed to reframe these beliefs.        |
| 5 + 6  | Continuing On Your Journey and Bringing it All Together | Focus on consolidation of skills and techniques. Planning on maintaining progress once the program has been completed.                                    |

**Supplementary Table 2. Propensity-matching between groups.** Mean demographic data, baseline anxiety (GAD-7) and mood (PHQ-9) scores for the ITT sample (“ieso Digital Program”) and mean data from the propensity-matched external control groups for waiting controls, face-to-face CBT and typed CBT.

| Variable          | Per-protocol                           |                                   | Intention-to-treat                     |                                    |                             |
|-------------------|----------------------------------------|-----------------------------------|----------------------------------------|------------------------------------|-----------------------------|
|                   | ieso Digital Program mean (sd) (N=169) | Waiting control mean (sd) (N=169) | ieso Digital Program mean (sd) (N=299) | Face-to-face CBT mean (sd) (N=299) | Typed CBT mean (sd) (N=299) |
| Age               | 41.7 (11.8)                            | 41.7 (13.3)                       | 39.8 (12.8)                            | 40.1 (16.6)                        | 39.8 (12.7)                 |
| Baseline GAD-7    | 12.4 (3.4)                             | 12.5 (3.3)                        | 12.5 (3.3)                             | 12.9 (3.1)                         | 12.6 (3.5)                  |
| Baseline PHQ-9    | 8.0 (3.8)                              | 8.4 (3.4)                         | 8.0 (3.7)                              | 8.4 (3.6)                          | 8.1 (3.6)                   |
| LTC ('yes')       | 70 (41.4)                              | 78 (46.2)                         | 114 (38.1)                             | 119 (39.8)                         | 108 (36.1)                  |
| LTC ('no')        | 91 (53.8)                              | 90 (53.3)                         | 167 (55.9)                             | 180 (60.2)                         | 173 (57.9)                  |
| LTC ('not known') | 8 (4.7)                                | 1 (0.6)                           | 18 (6.0)                               | 0                                  | 18 (6.0)                    |

**Supplementary Table 3. Output from slope analysis comparing adherence rate over GAD-7 check-ins across groups.** Adherence rate was defined as proportion of participants completing the GAD-7 check-in (either within the ieso digital program or at the start of their treatment session for the control groups) across seven total instances of GAD-7 data collection. Overlapping confidence intervals indicate no significant difference between groups in adherence rate.

| Group                | Slope  | Std. Error | L95%CI | U95%CI |
|----------------------|--------|------------|--------|--------|
| ieso Digital Program | -10.29 | 0.26       | -10.80 | -9.78  |
| Face-to-face CBT     | -9.55  | 0.31       | -10.16 | -8.95  |
| Typed CBT            | -10.99 | 0.58       | -12.14 | -9.85  |

**Supplementary Table 4. Output of linear regression model measuring the association between participant characteristics and adherence for the ITT sample.** Adherence was defined as the number of completed sessions in the digital program. All demographic data, GAD-7 score, and PHQ-9 score were collected at baseline. Enrolment path refers to whether a participant was a referred patient through NHS TT or was externally recruited. Reference values for each categorical variable were: chronic health condition = yes; gender = female; software version = 1; disability = yes; sexual orientation = heterosexual; employment = employed; ethnicity = white; qualification = degree; religion = Christian; enrolment path = NHS patient. \* =  $p < .05$ ; \*\* =  $p < .005$ .

| Variable                            | Estimate | Std. Error | t value | p-value | significance |
|-------------------------------------|----------|------------|---------|---------|--------------|
| (Intercept)                         | 10.083   | 3.360      | 3.001   | 0.0029  | **           |
| Baseline score: GAD-7               | -0.082   | 0.155      | -0.531  | 0.5959  |              |
| Baseline score :PHQ-9               | 0.060    | 0.133      | 0.448   | 0.6543  |              |
| Age (at screening)                  | 0.112    | 0.042      | 2.690   | 0.0076  | *            |
| Chronic health condition: no        | -0.156   | 1.091      | -0.143  | 0.8863  |              |
| Chronic health condition: not known | -2.144   | 2.571      | -0.834  | 0.4051  |              |
| Gender: male                        | -1.494   | 1.326      | -1.126  | 0.2611  |              |
| Gender: other                       | -1.171   | 4.210      | -0.278  | 0.7812  |              |
| Gender: not known                   | -0.718   | 5.159      | -0.139  | 0.8894  |              |
| Software version: version 2         | 0.095    | 1.169      | 0.081   | 0.9355  |              |
| Disability: no perceived disability | 0.620    | 1.292      | 0.480   | 0.6317  |              |
| Disability: prefer not to say       | -1.549   | 3.899      | -0.397  | 0.6914  |              |
| Sexual orientation: not known       | 2.065    | 2.789      | 0.740   | 0.4598  |              |
| Sexual orientation: other           | 1.741    | 1.396      | 1.247   | 0.2135  |              |
| Employment: not employed            | -1.921   | 1.372      | -1.400  | 0.1627  |              |
| Employment: not known               | -6.595   | 3.399      | -1.940  | 0.0534  |              |
| Ethnicity: not known                | 4.382    | 5.119      | 0.856   | 0.3928  |              |
| Ethnicity: other                    | 0.740    | 1.859      | 0.398   | 0.6909  |              |
| Qualification: below degree         | -1.371   | 1.214      | -1.130  | 0.2595  |              |
| Qualification: not known            | -2.040   | 6.078      | -0.336  | 0.7374  |              |
| Qualification: other                | -1.330   | 3.825      | -0.348  | 0.7282  |              |
| Qualification: postgraduate         | 1.786    | 1.135      | 1.573   | 0.1169  |              |
| Religion: not known                 | -0.847   | 3.021      | -0.280  | 0.7795  |              |
| Religion: other                     | -1.064   | 1.127      | -0.944  | 0.3458  |              |
| Enrolment path: external recruit    | 0.887    | 1.114      | 0.796   | 0.4266  |              |

Residual standard error: 7.835 on 274 degrees of freedom

Multiple R-squared: 0.1091, Adjusted R-squared: 0.0311

F-statistic: 1.399 on 24 and 274 DF, p-value: 0.1059

**Supplementary Table 5. Output of logistic regression model measuring association between participant characteristics and non-adherence.** Non-adherence was defined based on PP sample status, i.e. non-adherence (coded = 1) included all those *not* in the PP sample. All demographic data, GAD-7 score and PHQ-9 score were collected at baseline. Enrolment path refers to whether a participant was a referred patient through NHS TT or was externally recruited. Reference values for each categorical variable were: chronic health condition = yes; gender = female; software version = 1; disability = yes; sexual orientation = heterosexual; employment = employed; ethnicity = white; qualification = degree; religion = Christian; enrolment path = NHS patient. \* =  $p < .05$ .

| Variable                            | Estimate | Odds Ratio | Std. Error | z value | p-value | Significance |
|-------------------------------------|----------|------------|------------|---------|---------|--------------|
| (Intercept)                         | 0.846    | 2.33       | 0.908      | 0.932   | 0.3515  |              |
| Baseline score: GAD-7               | 0.000    | 1.00       | 0.042      | 0.003   | 0.9976  |              |
| Baseline score :PHQ-9               | -0.027   | 0.97       | 0.036      | -0.740  | 0.4590  |              |
| Age (at screening)                  | -0.030   | 0.97       | 0.011      | -2.607  | 0.0091  | *            |
| Chronic health condition: no LTC    | 0.227    | 1.25       | 0.296      | 0.766   | 0.4439  |              |
| Chronic health condition: not known | 0.252    | 1.29       | 0.681      | 0.371   | 0.7107  |              |
| Gender: male                        | 0.204    | 1.23       | 0.358      | 0.570   | 0.5685  |              |
| Gender: other                       | 0.209    | 1.23       | 1.126      | 0.186   | 0.8527  |              |
| Gender: not known                   | -0.353   | 0.70       | 1.665      | -0.212  | 0.8319  |              |
| Product version: version 2          | 0.009    | 1.01       | 0.315      | 0.027   | 0.9783  |              |
| Disability: no perceived disability | -0.189   | 0.83       | 0.351      | -0.538  | 0.5909  |              |
| Disability: prefer not to say       | 0.744    | 2.10       | 1.085      | 0.686   | 0.4926  |              |
| Sexual orientation: not known       | -0.555   | 0.57       | 0.768      | -0.723  | 0.4697  |              |
| Sexual orientation: other           | -0.398   | 0.67       | 0.381      | -1.044  | 0.2963  |              |
| Employment: not employed            | 0.694    | 2.00       | 0.372      | 1.863   | 0.0624  |              |
| Employment: not known               | 1.196    | 3.31       | 0.950      | 1.258   | 0.2082  |              |
| Ethnicity: not known                | -0.644   | 0.53       | 1.672      | -0.385  | 0.7001  |              |
| Ethnicity: other                    | 0.159    | 1.17       | 0.503      | 0.317   | 0.7513  |              |
| Qualification: below degree         | 0.493    | 1.64       | 0.327      | 1.510   | 0.1311  |              |
| Qualification: not known            | 0.457    | 1.58       | 1.595      | 0.287   | 0.7745  |              |
| Qualification: other                | 1.096    | 2.99       | 1.124      | 0.974   | 0.3299  |              |
| Qualification: postgraduate         | -0.074   | 0.93       | 0.309      | -0.239  | 0.8110  |              |
| Religion: not known                 | -0.201   | 0.82       | 0.829      | -0.243  | 0.8082  |              |
| Religion: other                     | 0.413    | 1.51       | 0.309      | 1.337   | 0.1812  |              |
| Enrolment path: external recruit    | -0.387   | 0.68       | 0.297      | -1.305  | 0.1920  |              |

Null deviance: 409.40 on 298 degrees of freedom

Residual deviance: 380.51 on 274 degrees of freedom; p-value = 2.123265e-05

AIC: 430.51

**Supplementary Table 6. Rates of improvement, recovery, reliable recovery, responder and remission from baseline to final score across all groups.** Improvement was defined as a reduction on the PHQ-9 or GAD-7 scales greater than the reliable change index ( $\geq 4$  for GAD-7;  $\geq 6$  for PHQ-9) and no reliable increase on either measure. Recovery was defined as reduction on both scales to below the clinical cutoff (PHQ-9 score  $< 10$  and GAD-7 score  $< 8$ ). Reliable recovery was defined as having both improved and recovered. Responder rate was defined as an improvement of  $\geq 4$  on the GAD-7 or  $\geq 6$  on the PHQ-9. Remission rate was defined as having a final GAD-7  $< 8$  or PHQ-9  $< 10$ , i.e. below the clinical cut-off. Unlike improvement, recovery, and reliable recovery, responder and remission rates were calculated for each questionnaire independently. For PHQ-9, remission and responder rates were only calculated for those above clinical cut-off at baseline (i.e. PHQ-9  $\geq 10$  at baseline).

| Sample             | Arm                  | N Total | Improvement |      | Recovery |      | Reliable Recovery |      | GAD-7 Remission |      | GAD-7 Responder |      | PHQ > cut-off | PHQ-9 Remission |      | PHQ-9 Responder |      |
|--------------------|----------------------|---------|-------------|------|----------|------|-------------------|------|-----------------|------|-----------------|------|---------------|-----------------|------|-----------------|------|
|                    |                      |         | N           | %    | N        | %    | N                 | %    | N               | %    | N               | %    | N             | N               | %    | N               | %    |
| Per-protocol       | Waiting control      | 169     | 61          | 36.1 | 46       | 27.2 | 34                | 20.1 | 48              | 28.4 | 56              | 33.1 | 66            | 36              | 54.5 | 16              | 9.5  |
|                    | ieso Digital Program | 169     | 139         | 82.2 | 130      | 76.9 | 122               | 72.2 | 136             | 80.5 | 138             | 81.7 | 69            | 57              | 82.6 | 46              | 27.2 |
|                    | Face-to-face CBT     | 253     | 189         | 74.7 | 164      | 64.8 | 157               | 62.1 | 170             | 67.2 | 185             | 73.1 | 103           | 84              | 81.6 | 78              | 30.8 |
|                    | Typed CBT            | 229     | 195         | 85.2 | 196      | 85.6 | 180               | 78.6 | 198             | 86.5 | 192             | 83.8 | 76            | 66              | 86.8 | 81              | 35.4 |
| Intention-to-treat | ieso Digital Program | 299     | 198         | 66.2 | 174      | 58.2 | 161               | 53.8 | 156             | 76.8 | 160             | 78.8 | 80            | 63              | 78.8 | 49              | 24.1 |
|                    | Face-to-face CBT     | 299     | 211         | 70.6 | 189      | 63.2 | 178               | 59.5 | 196             | 65.6 | 207             | 69.2 | 116           | 89              | 76.7 | 86              | 28.8 |
|                    | Typed CBT            | 299     | 230         | 76.9 | 226      | 75.6 | 204               | 68.2 | 229             | 76.6 | 228             | 76.3 | 104           | 82              | 78.8 | 88              | 29.4 |



**Supplementary Table 7. Mean GAD-7 score across assessments stratified by baseline GAD-7 severity.** Mean GAD-7 scores for both PP and ITT samples. Stratification by severity based on baseline GAD-7 score. Check-in scores were collected prior to each module within the digital program software. Screening, completion and follow-up scores were collected outside of the digital program. Data reported are for each specific data collection point.

| Study timepoint | Sample       | Per-protocol       |                      |                      |                      | Intention-to-treat |                      |                      |                      |
|-----------------|--------------|--------------------|----------------------|----------------------|----------------------|--------------------|----------------------|----------------------|----------------------|
|                 | Severity     | Mild               | Moderate             | Severe               | Overall              | Mild               | Moderate             | Severe               | Overall              |
| Screening       | N            | 39                 | 82                   | 48                   | 169                  | 62                 | 150                  | 87                   | 299                  |
|                 | Mean (95%CI) | 8.6<br>(8.4, 8.7)  | 11.7<br>(11.3, 12.0) | 16.9<br>(16.4, 17.4) | 12.4<br>(11.9, 13.0) | 8.5<br>(8.4, 8.6)  | 11.7<br>(11.5, 11.9) | 16.9<br>(16.5, 17.2) | 12.5<br>(12.2, 12.9) |
| Check-in 1      | N            | 39                 | 82                   | 48                   | 169                  | 59                 | 144                  | 81                   | 284                  |
|                 | Mean (95%CI) | 9.8<br>(8.5, 11.1) | 11.2<br>(10.4, 12.0) | 14.0<br>(12.9, 15.2) | 11.7<br>(11.1, 12.3) | 9.9<br>(8.9, 10.9) | 10.9<br>(10.3, 11.5) | 14.0<br>(13.2, 14.9) | 11.6<br>(11.1, 12.1) |
| Check-in 2      | N            | 39                 | 82                   | 48                   | 169                  | 54                 | 120                  | 66                   | 240                  |
|                 | Mean (95%CI) | 6.0<br>(5.1, 6.9)  | 8.1<br>(7.3, 8.9)    | 9.2<br>(8.1, 10.4)   | 7.9<br>(7.4, 8.5)    | 6.4<br>(5.5, 7.3)  | 8.1<br>(7.4, 8.7)    | 9.6<br>(8.5, 10.7)   | 8.1<br>(7.6, 8.6)    |
| Check-in 3      | N            | 39                 | 82                   | 48                   | 169                  | 46                 | 106                  | 57                   | 209                  |
|                 | Mean (95%CI) | 5.8<br>(4.7, 6.8)  | 7.0<br>(6.2, 7.9)    | 8.2<br>(6.9, 9.5)    | 7.1<br>(6.5, 7.7)    | 5.6<br>(4.7, 6.6)  | 7.2<br>(6.5, 8.0)    | 8.5<br>(7.3, 9.7)    | 7.2<br>(6.7, 7.8)    |
| Check-in 4      | N            | 39                 | 82                   | 48                   | 169                  | 40                 | 90                   | 50                   | 180                  |
|                 | Mean (95%CI) | 4.5<br>(3.7, 5.3)  | 5.9<br>(5.1, 6.6)    | 7.0<br>(5.8, 8.2)    | 5.8<br>(5.3, 6.4)    | 4.8<br>(3.8, 5.7)  | 5.9<br>(5.2, 6.6)    | 7.1<br>(5.9, 8.3)    | 6.0<br>(5.5, 6.5)    |
| Check-in 5      | N            | 31                 | 68                   | 36                   | 135                  | 31                 | 70                   | 37                   | 138                  |
|                 | Mean (95%CI) | 4.7<br>(3.6, 5.8)  | 5.4<br>(4.6, 6.1)    | 6.9<br>(5.2, 8.6)    | 5.6<br>(5.0, 6.2)    | 4.7<br>(3.6, 5.8)  | 5.3<br>(4.6, 6.0)    | 7.3<br>(5.5, 9.1)    | 5.7<br>(5.0, 6.3)    |
| Check-in 6      | N            | 23                 | 61                   | 28                   | 112                  | 23                 | 62                   | 28                   | 113                  |
|                 | Mean (95%CI) | 3.9<br>(2.8, 5.1)  | 5.2<br>(4.4, 6.1)    | 6.5<br>(4.6, 8.4)    | 5.3<br>(4.6, 6.0)    | 3.9<br>(2.8, 5.1)  | 5.2<br>(4.3, 6.0)    | 6.5<br>(4.6, 8.4)    | 5.2<br>(4.5, 5.9)    |
| Completion      | N            | 39                 | 82                   | 48                   | 169                  | 46                 | 101                  | 56                   | 203                  |
|                 | Mean (95%CI) | 4.2<br>(3.3, 5.1)  | 4.8<br>(4.2, 5.5)    | 6.2<br>(4.8, 7.6)    | 5.1<br>(4.5, 5.6)    | 4.3<br>(3.4, 5.1)  | 5.4<br>(4.7, 6.0)    | 6.7<br>(5.3, 8.0)    | 5.5<br>(4.9, 6.0)    |
| Follow-up       | N            | 39                 | 80                   | 47                   | 166                  | 48                 | 106                  | 56                   | 210                  |
|                 | Mean (95%CI) | 4.5<br>(3.5, 5.4)  | 4.7<br>(4.0, 5.5)    | 6.3<br>(4.8, 7.6)    | 5.1<br>(4.5, 5.7)    | 4.6<br>(3.8 ; 5.5) | 5.5<br>(4.7, 6.2)    | 6.7<br>(5.3, 8.1)    | 5.6<br>(5.0, 6.2)    |

**Supplementary Table 8. Change in GAD-7, PHQ-9 and WSAS scores from baseline to final score stratified by baseline GAD-7 severity for the intervention sample.** Change (i.e. mean difference) in GAD-7, PHQ-9 and WSAS scores was calculated using the difference between baseline and final scores for the digital intervention group. A negative mean difference denotes a reduction in scores. Within-subject effect sizes (Cohen's *d*) calculated for the total sample and each severity subgroup based on baseline GAD-7 severity stratification.

| Sample              | GAD-7 severity | N   | Baseline score |     | Change in score |     |              |              |                                          |
|---------------------|----------------|-----|----------------|-----|-----------------|-----|--------------|--------------|------------------------------------------|
|                     |                |     | Mean           | SD  | Mean            | SD  | Lower 95% CI | Upper 95% CI | Within-subjects effect size ( <i>d</i> ) |
| <b><i>GAD-7</i></b> |                |     |                |     |                 |     |              |              |                                          |
| Per-protocol        | Mild           | 39  | 8.6            | 0.5 | -4.4            | 3.0 | -3.4         | -5.3         | 1.4                                      |
|                     | Moderate       | 82  | 11.7           | 1.5 | -6.8            | 3.4 | -6.1         | -7.6         | 2.0                                      |
|                     | Severe         | 48  | 16.9           | 1.7 | -10.7           | 5.3 | -9.2         | -12.3        | 2.0                                      |
|                     | <b>Overall</b> | 169 | 12.4           | 3.4 | -7.4            | 4.6 | -6.7         | -8.1         | 1.6                                      |
| Intention-to-treat  | Mild           | 62  | 8.5            | 0.5 | -2.9            | 4.1 | -1.9         | -4.0         | 0.7                                      |
|                     | Moderate       | 150 | 11.7           | 1.4 | -5.0            | 4.2 | -4.3         | -5.7         | 1.2                                      |
|                     | Severe         | 87  | 16.9           | 1.6 | -7.9            | 6.0 | -6.6         | -9.2         | 1.3                                      |
|                     | <b>Overall</b> | 299 | 12.5           | 3.3 | -5.4            | 5.1 | -4.8         | -6.0         | 1.1                                      |
| <b><i>PHQ-9</i></b> |                |     |                |     |                 |     |              |              |                                          |
| Per-protocol        | Mild           | 39  | 6.9            | 3.5 | -2.3            | 3.0 | -1.3         | -3.3         | 0.8                                      |
|                     | Moderate       | 82  | 7.5            | 3.7 | -2.7            | 4.4 | -1.8         | -3.7         | 0.6                                      |
|                     | Severe         | 48  | 9.7            | 3.8 | -4.5            | 5.5 | -2.9         | -6.1         | 0.8                                      |
|                     | <b>Overall</b> | 169 | 8.0            | 3.8 | -3.1            | 4.5 | -2.4         | -3.8         | 0.7                                      |
| Intention-to-treat  | Mild           | 62  | 6.7            | 3.1 | -1.3            | 4.0 | -0.3         | -2.3         | 0.3                                      |
|                     | Moderate       | 150 | 7.5            | 3.5 | -1.3            | 4.6 | -0.6         | -2.0         | 0.3                                      |
|                     | Severe         | 87  | 9.7            | 3.9 | -2.3            | 5.5 | -1.2         | -3.5         | 0.4                                      |
|                     | <b>Overall</b> | 299 | 8.0            | 3.7 | -1.6            | 4.8 | -1.1         | -2.1         | 0.3                                      |
| <b><i>WSAS</i></b>  |                |     |                |     |                 |     |              |              |                                          |
| Per-protocol        | Mild           | 39  | 12.9           | 5.9 | -3.7            | 6.0 | -1.7         | -5.6         | 0.6                                      |
|                     | Moderate       | 82  | 15.1           | 6.7 | -5.7            | 6.0 | -4.3         | -7.0         | 0.9                                      |
|                     | Severe         | 48  | 17.4           | 5.5 | -6.0            | 6.4 | -4.2         | -7.9         | 0.9                                      |
|                     | <b>Overall</b> | 169 | 15.3           | 6.4 | -5.3            | 6.2 | -4.4         | -6.2         | 0.9                                      |
| Intention-to-treat  | Mild           | 58  | 12.2           | 5.6 | -3.4            | 6.0 | -1.6         | -5.2         | 0.6                                      |
|                     | Moderate       | 150 | 14.9           | 6.9 | -4.8            | 6.4 | -3.5         | -6.1         | 0.8                                      |
|                     | Severe         | 87  | 16.8           | 6.1 | -5.5            | 6.9 | -3.7         | -7.4         | 0.8                                      |
|                     | <b>Overall</b> | 295 | 14.9           | 6.6 | -4.7            | 6.5 | -3.8         | -5.6         | 0.7                                      |

**Supplementary Table 9. Output of linear regression model measuring association between participant characteristics and change in GAD-7 scores for the ITT intervention sample.** Dependent variable was change in GAD-7 score from baseline to final score. All demographic data, GAD-7 score and PHQ-9 score were collected at baseline. Enrolment path refers to whether a participant was a referred patient from NHS TT or was externally recruited. Reference values for each categorical variable were: chronic health condition = yes; gender = female; software version = 1; disability = yes; sexual orientation = heterosexual; employment = employed; ethnicity = white; qualification = degree; religion = Christian; enrolment path = NHS patient. \* =  $p < .05$ ; \*\* =  $p < .005$ ; \*\*\* =  $p < .001$

| Variable                                  | Estimate | Std. Error | t value | p-value | significance |
|-------------------------------------------|----------|------------|---------|---------|--------------|
| (Intercept)                               | -4.126   | 1.993      | -2.071  | 0.0393  | *            |
| Baseline score: GAD-7                     | 0.696    | 0.092      | 7.575   | 0.0000  | ***          |
| Baseline score :PHQ-9                     | -0.125   | 0.079      | -1.584  | 0.1143  |              |
| Age (at screening)                        | 0.074    | 0.025      | 2.999   | 0.0030  | **           |
| Chronic health condition: no LTC          | -0.516   | 0.647      | -0.798  | 0.4256  |              |
| Chronic health condition: not known Known | -1.749   | 1.525      | -1.147  | 0.2523  |              |
| Gender: male                              | 0.177    | 0.787      | 0.225   | 0.8219  |              |
| Gender: other                             | -2.606   | 2.497      | -1.044  | 0.2975  |              |
| Gender: not known                         | 0.253    | 3.059      | 0.083   | 0.9342  |              |
| Product version: version 2                | 0.022    | 0.693      | 0.031   | 0.9751  |              |
| Disability: no perceived disability       | -0.222   | 0.766      | -0.290  | 0.7722  |              |
| Disability: prefer not to say             | -0.156   | 2.312      | -0.067  | 0.9464  |              |
| Sexual orientation: not known             | -1.156   | 1.654      | -0.699  | 0.4853  |              |
| Sexual orientation: other                 | 0.812    | 0.828      | 0.981   | 0.3274  |              |
| Employment: not employed                  | -1.589   | 0.814      | -1.953  | 0.0519  | .            |
| Employment: not known                     | -1.081   | 2.016      | -0.536  | 0.5921  |              |
| Ethnicity: not known                      | 1.052    | 3.035      | 0.347   | 0.7292  |              |
| Ethnicity: other                          | 1.240    | 1.103      | 1.124   | 0.2619  |              |
| Qualification: below degree               | -0.372   | 0.720      | -0.516  | 0.6061  |              |
| Qualification: not known                  | -1.272   | 3.604      | -0.353  | 0.7245  |              |
| Qualification: other                      | -0.333   | 2.268      | -0.147  | 0.8833  |              |
| Qualification: postgraduate               | -0.756   | 0.673      | -1.123  | 0.2626  |              |
| Religion: not known                       | 0.010    | 1.792      | 0.006   | 0.9954  |              |
| Religion: other                           | 0.104    | 0.668      | 0.156   | 0.8759  |              |
| Enrolment path: external recruit          | -0.250   | 0.661      | -0.378  | 0.7056  |              |

Residual standard error: 4.656 on 274 degrees of freedom  
 Multiple R-squared: 0.232, Adjusted R-squared: 0.1647 F-statistic: 3.449 on 24 and 274 DF, p-value: 3.546e-07

**Supplementary Table 10. Mean PHQ-9 score across assessments stratified by baseline GAD-7 severity.** Mean scores for both PP and ITT samples. Stratification by severity based on baseline GAD-7 scores. Check-in scores were collected prior to each module within the digital program software. Screening, completion and follow-up scores were collected outside of the digital program. Data reported are for each specific data collection point.

| Study timepoint | Sample       | Per-protocol    |                  |                   |                   | Intention-to-treat |                  |                   |                   |
|-----------------|--------------|-----------------|------------------|-------------------|-------------------|--------------------|------------------|-------------------|-------------------|
|                 | Severity     | Mild            | Moderate         | Severe            | Overall           | Mild               | Moderate         | Severe            | Overall           |
| Screening       | N            | 39              | 82               | 48                | 169               | 62                 | 150              | 87                | 299               |
|                 | Mean (95%CI) | 6.9 (5.7, 8.0)  | 7.5 (6.7; 8.3)   | 9.7 (8.6; 10.8)   | 8.0 (7.4; 8.6)    | 6.7 (5.9, 7.5)     | 7.5 (6.9, 8.1)   | 9.7 (8.9, 10.5)   | 8.0 (7.5, 8.4)    |
| Check-in 1      | N            | 39              | 82               | 48                | 169               | 59                 | 144              | 81                | 284               |
|                 | Mean (95%CI) | 9.7 (8.1, 11.3) | 10.6 (9.7, 11.5) | 12.5 (11.3, 13.8) | 10.9 (10.2, 11.6) | 9.2 (8.0, 10.4)    | 10.3 (9.6, 10.9) | 12.3 (11.3, 13.3) | 10.6 (10.2, 11.2) |
| Check-in 2      | N            | 39              | 82               | 48                | 169               | 54                 | 120              | 66                | 240               |
|                 | Mean (95%CI) | 6.7 (5.4, 7.9)  | 7.5 (6.5, 8.4)   | 7.7 (6.5, 8.9)    | 7.3 (6.7, 8.0)    | 6.5 (5.6, 7.6)     | 7.3 (6.6, 8.0)   | 8.0 (6.9, 9.1)    | 7.3 (6.8, 7.9)    |
| Check-in 3      | N            | 39              | 82               | 48                | 169               | 46                 | 106              | 57                | 209               |
|                 | Mean (95%CI) | 5.7 (4.7, 6.7)  | 6.5 (5.5, 7.4)   | 6.9 (5.7, 8.2)    | 6.4 (5.8, 7.0)    | 5.6 (4.6, 6.5)     | 6.4 (5.6, 7.2)   | 6.9 (5.8, 8.1)    | 6.4 (5.8, 6.9)    |
| Check-in 4      | N            | 39              | 82               | 48                | 169               | 40                 | 90               | 50                | 180               |
|                 | Mean (95%CI) | 5.1 (4.0, 6.2)  | 5.9 (5.1, 6.7)   | 5.7 (4.6, 6.8)    | 5.7 (5.1, 6.2)    | 5.4 (4.1, 6.7)     | 6.0 (5.2, 6.7)   | 5.9 (4.8, 7.0)    | 5.8 (5.3, 6.4)    |
| Check-in 5      | N            | 31              | 68               | 36                | 135               | 31                 | 70               | 37                | 138               |
|                 | Mean (95%CI) | 5.8 (4.3, 7.2)  | 5.5 (4.6, 6.4)   | 6.1 (4.8, 7.5)    | 5.7 (5.1, 6.4)    | 5.8 (4.3, 7.2)     | 5.4 (4.5, 6.3)   | 6.5 (5.0, 8.1)    | 5.8 (5.1, 6.5)    |
| Check-in 6      | N            | 23              | 61               | 28                | 112               | 23                 | 62               | 28                | 113               |
|                 | Mean (95%CI) | 4.2 (2.9, 5.5)  | 4.9 (3.9, 5.9)   | 5.4 (3.7, 7.1)    | 4.9 (4.2, 5.6)    | 4.2 (2.9, 5.5)     | 4.9 (4.0, 5.9)   | 5.4 (3.7, 7.1)    | 4.9 (4.2, 5.6)    |
| Completion      | N            | 39              | 82               | 48                | 169               | 46                 | 101              | 56                | 203               |
|                 | Mean (95%CI) | 4.6 (3.5, 5.7)  | 4.8 (4.0, 5.6)   | 5.2 (4.0, 6.4)    | 4.9 (4.3, 5.4)    | 4.5 (3.5, 5.5)     | 5.1 (4.3, 5.9)   | 5.3 (4.2, 6.4)    | 5.0 (4.5, 5.6)    |
| Follow-up       | N            | 39              | 80               | 47                | 166               | 48                 | 106              | 56                | 210               |
|                 | Mean (95%CI) | 5.2 (3.9, 6.6)  | 5.3 (4.2, 6.3)   | 5.7 (4.1, 7.2)    | 5.4 (4.7, 6.1)    | 5.1 (4.0, 6.3)     | 5.6 (4.7, 6.5)   | 5.9 (4.5, 7.3)    | 5.6 (4.9, 6.2)    |
